# Supplementary material
Source: publisher figshare collection journal article supplement (https://acs.figshare.com/ndownloader/files/4614409)
Supplement: Supplementary file 1 [file 4614409]

## Supplemental Figure

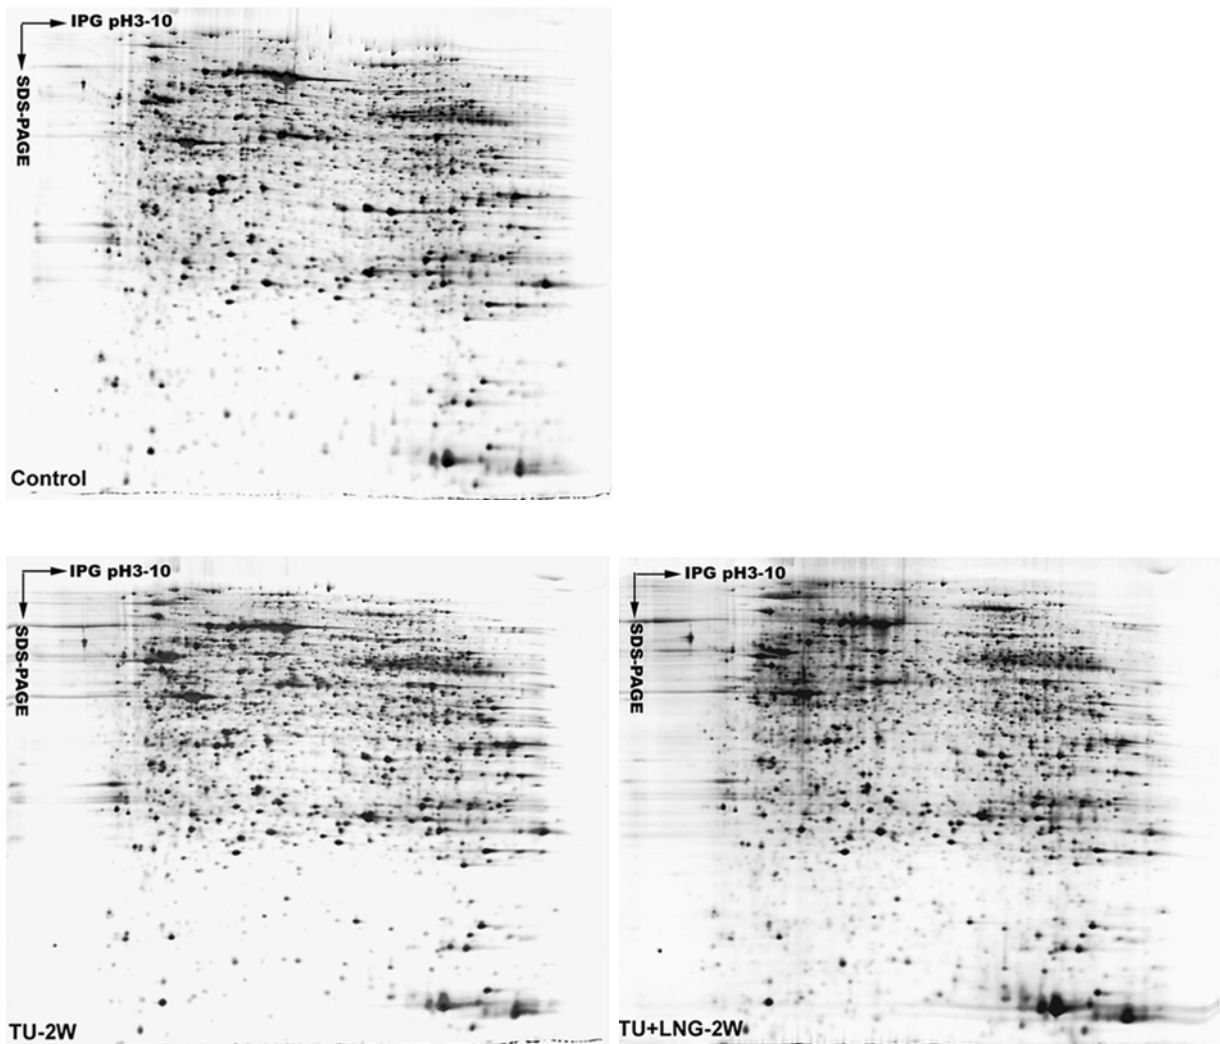

Two-dimensional electrophoresis (2-DE) gels of the testis lysate from normal subjects, and from the subjects 2 weeks after TU treatment, and from the subjects 2 weeks after TU+LNG treatment (A). Proteins were extracted and separated by two-dimensional polyacrylamide gel electrophoresis and detected by silver staining.
